# Supplementary material
Source: PubMed Central journal article supplement (PMC5127678)
Supplement: jci-126-86950-s001.pdf [file jci-126-86950-s001.pdf]

## 1 TABLES

|                      | Vehicle  |            | ANGII    |            |
|----------------------|----------|------------|----------|------------|
|                      | Vehicle  | Clodronate | Vehicle  | Clodronate |
| <b>ANGII 14 days</b> | 22.6±2.0 | 22.1±0.9   | 22.1±2.0 | 21.2±1.5   |
| <b>ANGII iv</b>      | 22.7±2.3 | 23.3±1.7   | 24.1±2.4 | 22.3±0.8   |
| <b>ANGII topical</b> | 22.6±2.0 | 22.1±1.3   | 23.7±2.1 | 22.3±1.6   |

2

|                      | Vehicle  |                         | ANGII    |                         |
|----------------------|----------|-------------------------|----------|-------------------------|
|                      | WT→WT    | AT1R <sup>-/-</sup> →WT | WT→WT    | AT1R <sup>-/-</sup> →WT |
| <b>ANGII 14 days</b> | 24.0±1.2 | 28.3±0.5                | 26.2±1.5 | 25.9±1.6                |
| <b>ANGII topical</b> | 25.3±1.1 | 27.7±0.7                | 23.6±0.8 | 28.0±1.6                |
| <b>Aβ topical</b>    | 23.8±1.3 | 28.1±3.5                | 21.9±2.3 | 26.9±3.3                |

3

|                      | Vehicle  |                         | ANGII    |                        |
|----------------------|----------|-------------------------|----------|------------------------|
|                      | WT→WT    | NOX2 <sup>-/-</sup> →WT | WT→WT    | NOX <sup>-/-</sup> →WT |
| <b>ANGII 14 days</b> | 25.5±1.4 | 22.4±4.2                | 25.0±2.6 | 23.3±1.2               |

4

|  | Control  |            | BPH2J    |            |
|--|----------|------------|----------|------------|
|  | Vehicle  | Clodronate | Vehicle  | Clodronate |
|  | 23.8±1.7 | 21.8±3.8   | 23.2±1.8 | 22.9±1.9   |

5

6 **Supplementary Table.** CBF responses to neocortical adenosine administration.

7

8

9

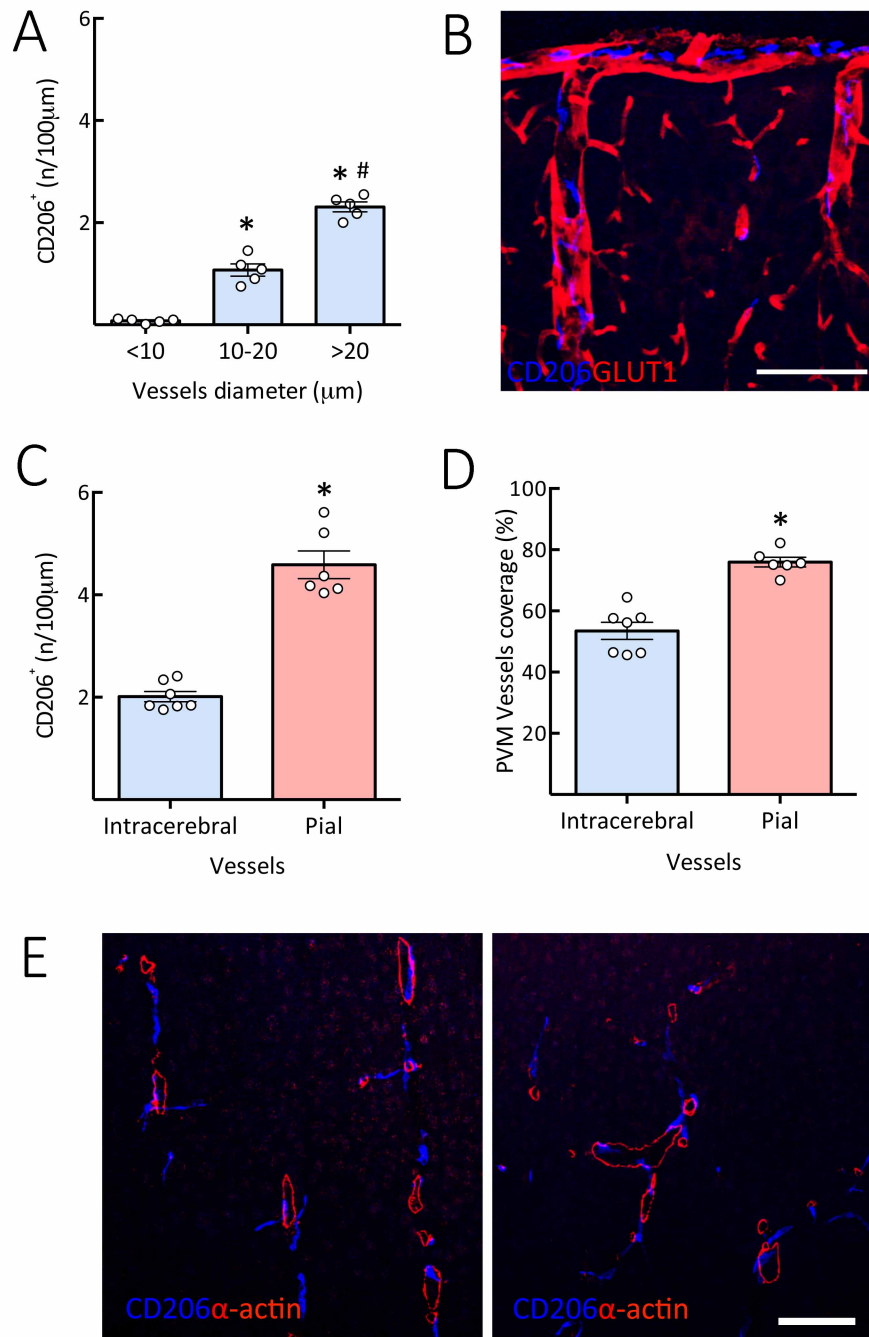

### Supplementary figure 1

**Anatomical distribution of PVM on cerebral blood vessels.** (A) PVM are mainly found in association with vessels larger than 10 $\mu\text{m}$  in diameter. \* $p < 0.05$  vs vessel diameter <10 $\mu\text{m}$  and # $p < 0.05$  vs vessel diameter 10-20 $\mu\text{m}$ ;  $n = 5/\text{group}$  (One-way repeated measures ANOVA and Tukey's test). (B-D) Among larger cortical vessels (>20 $\mu\text{m}$  in diameter), the highest PVM number and coverage, expressed as percentage of the length of the vessels covered by PVM, are found in pial arteries. \* $p < 0.05$  vs intracerebral vessels;  $n = 6-7/\text{group}$  (Student's  $t$  test). (E) PVM are found in association with penetrating arterioles identified by the vascular smooth muscle cell marker, alpha-actin. Scale bar: 100 $\mu\text{m}$ .

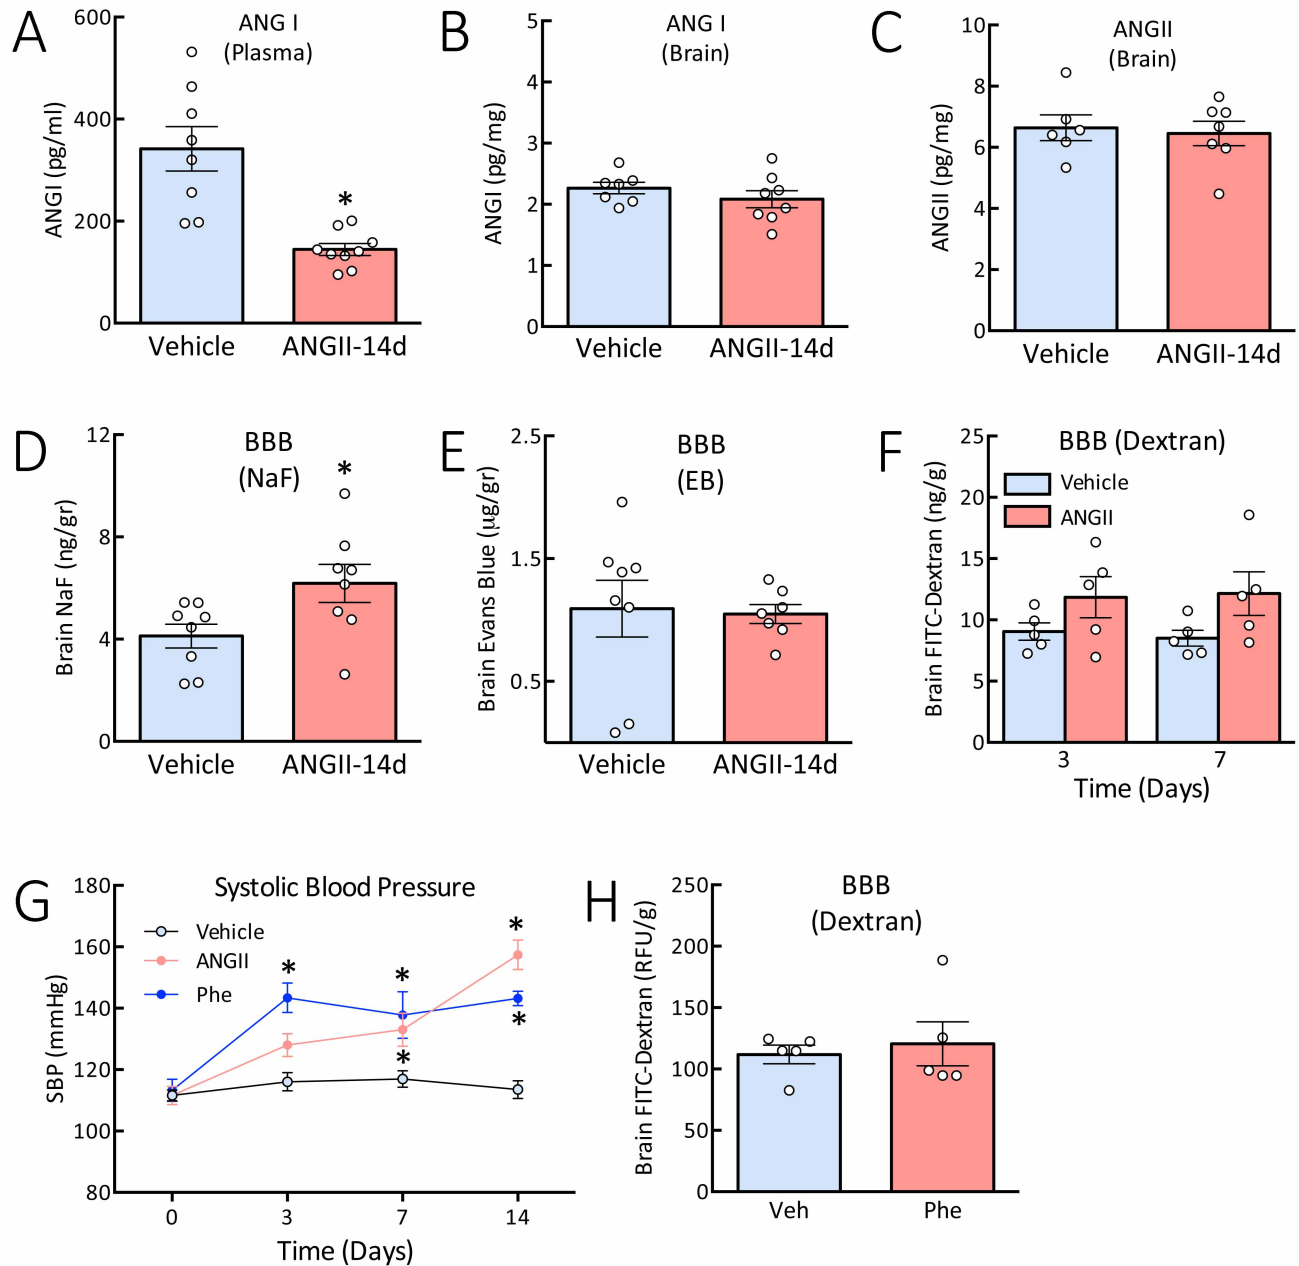

### Supplementary Figure 2

#### Effect of ANGII slow pressor hypertension on ANG I and ANGII, and on BBB permeability.

(A) Plasma ANG I is reduced in slow pressor ANGII hypertension, reflecting reduced endogenous ANGII synthesis, whereas brain ANG I and ANGII are not altered (B and C). ANGII increases BBB permeability to sodium fluorescein (NaF)(MW 0.4kDa) (D) but not to Evans blue (EB)(MW 69kDa) (E). \* $p < 0.05$  vs vehicle;  $n = 7-8$ /group (Student's  $t$  test). (F) ANGII tends to increase BBB permeability to FITC-Dextran at 3 and 7 days but the effect does not reach significance until day 14 (Figure 2). \* $p < 0.05$  vs time 3, 7 and 14 (Veh);  $n = 5-10$ /group (Two-way ANOVA and Bonferroni's test). (G and I) Phenylephrine (Phe) increases SBP similarly to ANGII but fails to increase BBB permeability to FITC-Dextran (MW 3kDa). \* $p < 0.05$  vs time 3, 7, and 14 (Veh);  $n = 6-7$ /group (Two-way ANOVA plus Bonferroni's test and Student's  $t$  test).

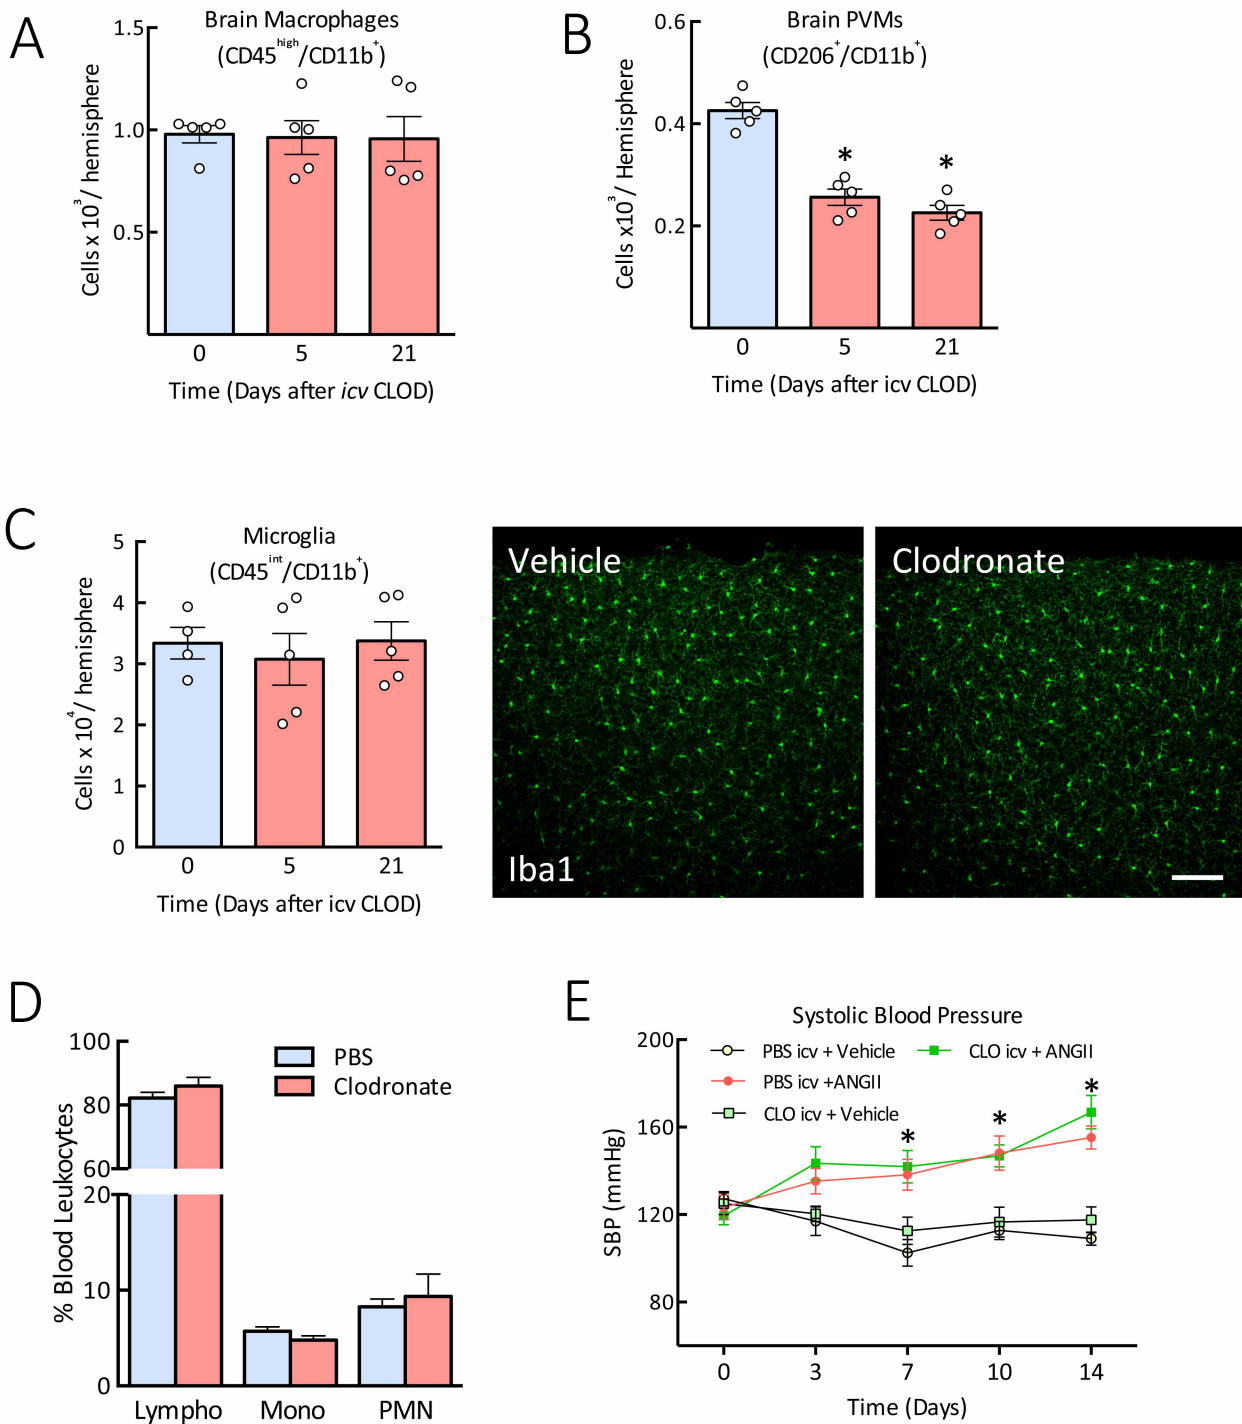

### Supplementary Figure 3

**Intracerebroventricular administration of clodronate depletes perivascular macrophages but does not affect microglia, circulating leukocytes or ANGII hypertension.** (A) CLOD icv administration selectively depletes brain PVM without affecting the number of brain macrophages and microglia (B and C) assessed both by flow cytometry. \* $p < 0.05$  vs time 0;  $n = 5$ /group (One-way ANOVA and Tukey's test). (D) CLOD icv administration does not affect blood leukocytes or (E) the blood pressure increase induced by ANGII administration. \* $p < 0.05$  vs time 7, 10 and 14 (PBS icv-Veh or CLOD icv-Veh);  $n = 5$ /group (Two-way ANOVA and Bonferroni's test).

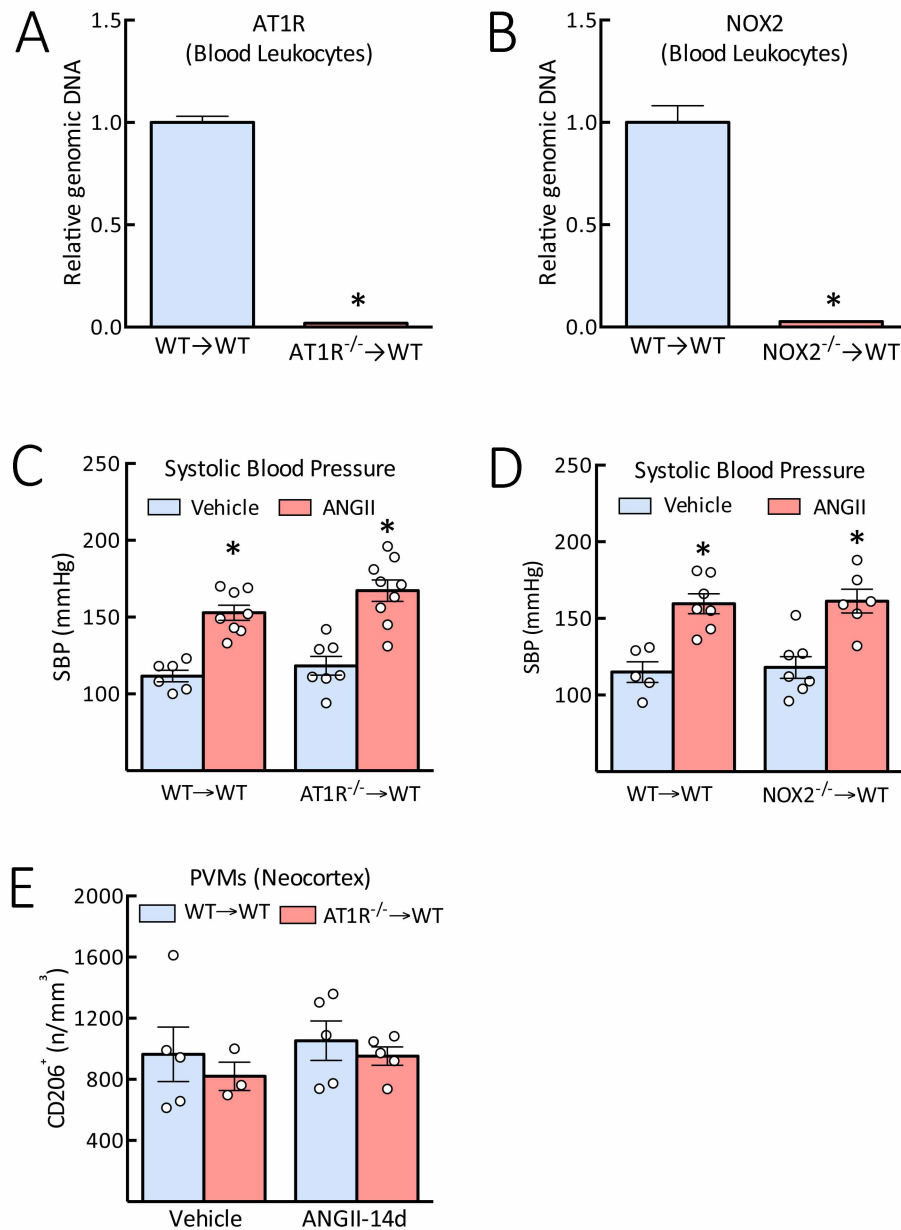

#### Supplementary Figure 4

**Genomic analysis, ANGII-induced blood pressure elevation and PVM in bone marrow chimeras.** (A) Genomic DNA analysis show that blood leukocytes are AT1R<sup>-/-</sup> and NOX2<sup>-/-</sup> in AT1R<sup>-/-</sup>→WT and in in NOX2<sup>-/-</sup>→WT chimeras, respectively, indicating a chimerism >95%. \*p<0.05 vs WT→WT; n=5-12 (Student's *t* test). (C and D) AT1R or NOX2 deletion in bone marrow-derived cells does not affect the elevation in systolic blood pressure (tail cuff) produced by slow pressor doses of ANGII after 14 days of administration. \* p <0.05, from WT→WT-Veh and AT1R<sup>-/-</sup>→WT-Veh; n=6-9/group; # p <0.05, from WT→WT-Veh and NOX2<sup>-/-</sup>→WT-Veh; n=5-9/group (Two-way ANOVA and Bonferroni's test). (E) Lack of AT1R in bone marrow cells does not alter the homing of PVM into the brain.

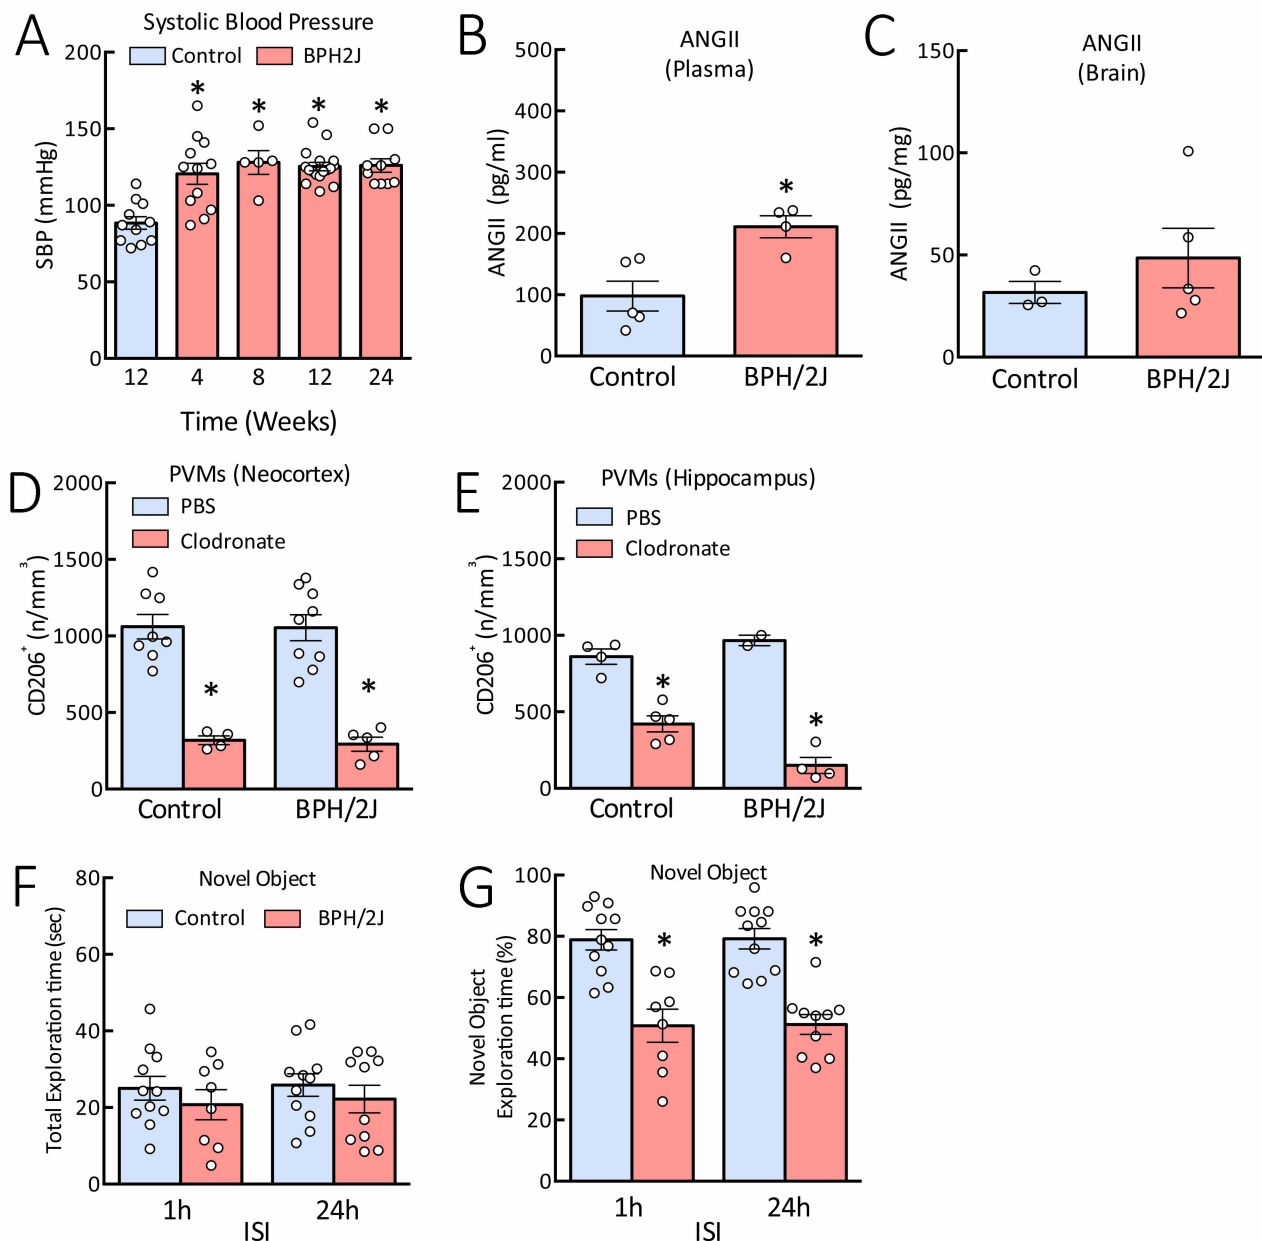

### Supplementary Figure 5

**Systolic blood pressure, plasma and brain ANGII, and effect of clodronate on PVM in BPH/2J and control mice.** (A) Systolic blood pressure (tail cuff) is increased as early as the fourth week of age in BPH/2J mice; \* $p < 0.05$  vs control 12 wks;  $n = 10-11$ /group (One-way ANOVA and Tukey's test). Plasma (B) but not brain (C) ANGII levels are increased in BPH/2J mice; \* $p < 0.05$  vs control;  $n = 3-5$  (Student's  $t$  test). CLOD icv administration reduces the number of CD206<sup>+</sup> cells in neocortex (D) and hippocampus (E) of BPH/2J and control mice. \*  $p < 0.05$ , from PBS-Control and PBS-BPH/2J; #  $p < 0.05$ , from CLOD-Control;  $n = 2-9$ /group (Two-way ANOVA and Bonferroni's test). (F and G) The recognition memory deficits, assessed by the novel object recognition test, are present, in BPH/2J mice, after 1 and 24h from the familiarization trial. \*  $p < 0.05$ , from control 1h and 24h;  $n = 10-12$ /group (Two-way ANOVA and Bonferroni's test). ISI = Interession Interval.
